**Woods, A. H., Bonnecaze, R. T. and Zrubek, B.** (2005). Oxygen and water flux across eggshells of *Manduca sexta*. *J. Exp. Biol.* **208**, 1297-1308.

In both the on-line and print versions of this paper, the left hand y axis of Fig. 6A was labelled incorrectly as:

Water vapour flux  $\times 10^6$  (mol s<sup>-1</sup> m<sup>-2</sup>).

The correct label should read:

Water vapour flux  $\times 10^5$  (mol s<sup>-1</sup> m<sup>-2</sup>).

The error does not affect any of the conclusions of the paper and the authors apologise for any inconvenience caused.

---

**Day, N. and Butler, P. J.** (2005). The effects of acclimation to reversed seasonal temperatures on the swimming performance of adult brown trout *Salmo trutta*. *J. Exp. Biol.* **208**, 2683-2692.

On page 2686 an error appeared in the second sentence of the second paragraph of the Results section in both the on-line and print versions of this paper, which reads:

However in both winter and summer, the  $U_{critS}$  of these groups were significantly higher than those for the groups acclimated to the reversed seasonal temperatures (5°C in winter, 15°C in summer).

The correct sentence should read:

However in both winter and summer, the  $U_{critS}$  of these groups were significantly higher than those for the groups acclimated to the reversed seasonal temperatures (15°C in winter, 5°C in summer).

The authors apologise for any inconvenience caused.
